1 **Environmental drivers of ranavirus in free-living amphibians in constructed ponds.**

2

3 Youker-Smith, T.E.<sup>1</sup>, Boersch-Supan, P.H.<sup>2,3</sup>, Whipps, C.M.<sup>1</sup>, Ryan, S.J.\*<sup>2,3</sup>

4 1. Department of Environmental and Forest Biology, State University of New York College of  
5 Environmental Science and Forestry, Syracuse, NY, 13210 USA

6 \*2. Quantitative Disease Ecology and Conservation (QDEC) Lab, Department of Geography,  
7 University of Florida, Gainesville, FL, 32601 USA PH: 352 294 7513; sjryan@ufl.edu

8 3. Emerging Pathogens Institute, University of Florida, Gainesville, FL, 32610 USA

9

10 **Abstract**

11 Amphibian ranaviruses occur globally, but we are only beginning to understand mechanisms for  
12 emergence. Ranaviruses are aquatic pathogens which can cause > 90% mortality in larvae of  
13 many aquatic-breeding amphibians, making them important focal host taxa. Host susceptibilities  
14 and virulence of ranaviruses have been studied extensively in controlled laboratory settings, but  
15 research is needed to identify drivers of infection in natural environments. Constructed ponds,  
16 essential components of wetland restoration, have been associated with higher ranavirus  
17 prevalence than natural ponds, posing a conundrum for conservation efforts, and emphasizing the  
18 need to understand potential drivers. In this study, we analyzed four years of *Frog virus 3*  
19 prevalence and associated environmental parameters in populations of wood frogs (*Lithobates*  
20 *sylvaticus*) and green frogs (*Lithobates clamitans*) in a constructed pond system. High prevalence  
21 was best predicted by low temperature, high host density, low zooplankton concentrations, and  
22 Gosner stages approaching metamorphosis. This study identified important variables to measure  
23 in assessments of ranaviral infection risk in newly constructed ponds, including effects of  
24 zooplankton, which have not been previously quantified in natural settings. Examining factors  
25 mediating diseases in natural environments, particularly in managed conservation settings, is  
26 important to both validate laboratory findings *in situ*, and to inform future conservation planning,  
27 particularly in the context of adaptive management.

28

29 **Key Words:** Ranavirus, *Frog virus 3*, constructed wetlands, *Lithobates sylvaticus*, *Lithobates*  
30 *clamitans*, vernal pools

31

32

## 33 **Introduction**

34 Ranaviruses are primarily infectious pathogens of aquatic ectothermic vertebrates, and have been  
35 implicated in mass die-offs of amphibians worldwide (Duffus et al. 2015). Many anuran species,  
36 including the wood frog (*Lithobates sylvaticus*), experience nearly 100% mortality after exposure  
37 as larvae (Hoverman et al. 2011). Little is currently known about reasons for ranavirus  
38 emergence, although anthropogenic disturbance is suspected as a leading factor (Jancovich et al.  
39 2005; Forson and Storfer 2006; Storfer et al. 2007; Miller et al. 2009). With increasing  
40 awareness of potential human influence, research efforts are aimed at identifying risk factors for  
41 infection with the goal of reducing both spread and persistence of ranaviruses. In this study we  
42 identified factors influencing prevalence of *Frog virus 3* (FV3), a widespread ranavirus, in  
43 populations of *L. sylvaticus* and green frogs (*Lithobates clamitans*) in a constructed vernal pool  
44 array in New York State, United States, by developing statistical models of prevalence in  
45 response to environmental and organism-focused variables.

46

47 Individual factors have been evaluated in controlled settings to determine virulence of  
48 ranaviruses both in the environment and within hosts. Ranaviral replication rates *in vitro*  
49 generally increase as temperature increases (Ariel et al. 2009); however, ranaviral infectivity  
50 declines at a faster rate at higher temperatures (Nazir et al. 2012; Munro et al. 2016).

51 Ranaviruses may persist in the environment for several weeks to months in dry conditions (Nazir  
52 et al. 2012; Munro et al. 2016). This raises concern when examining recurring outbreaks because  
53 many wetland types that support populations of aquatic-breeding anurans in the northeastern  
54 United States may partially or completely dry up during late summer or over winter.

55 Furthermore, the interplay of pond-drying and other abiotic factors on the prevalence and

56 infection dynamics of aquatic diseases remains poorly understood (Paull and Johnson 2018).  
57 Vernal pools also support highly diverse microbial and micro-invertebrate communities, and  
58 although less rigorously studied, these communities could be highly influential in understanding  
59 outbreak etiology. For example, FV3 becomes less virulent in the presence of zooplankton  
60 (Johnson and Brunner 2014), and survives longer in filtered and sterilized water (Nazir et al.  
61 2012; Johnson and Brunner 2014; Munro et al. 2016).

62  
63 In addition to environmental conditions, we examined several variables shown to affect  
64 susceptibility of amphibians to FV3 including developmental stage, and density. Although both  
65 *L. sylvaticus* and *L. clamitans* have relatively high probabilities of infection and mortality when  
66 exposed to FV3, we expect highest prevalence rates overall in *L. sylvaticus* (Hoverman et al.  
67 2011). Water temperature produces different results with respect to infectivity and mortality,  
68 depending on both *Ranavirus* strain and host species (Rojas et al. 2005; Bayley et al. 2013;  
69 Echaubard et al. 2014; Brand et al. 2016). In regards to specifically FV3 and anuran ranid  
70 species (which includes *L. sylvaticus* and *L. clamitans*), research has produced conflicting  
71 results. Many controlled studies supported a positive correlation, with higher mortality rates at  
72 warmer temperatures (Bayley et al. 2013; Brand et al. 2016). In contrast, Echaubard et al. (2014)  
73 and Gray et al. (2007) found that probability of both infection and mortality was *lower* at warmer  
74 temperatures. In a natural setting, seasonal increases in temperature generally correspond with  
75 progression towards metamorphosis in aquatic anuran larvae, measured by increases in Gosner  
76 developmental stage (Gosner 1960). When examining Gosner stage alone, different species  
77 exhibit differing trends in susceptibility, but in ranid species infection and mortality generally  
78 increase as larvae approach metamorphosis (Haislip et al. 2011; Warne et al. 2011). It is unclear

79 what role host density may play in FV3 outbreaks, as response to density is non-linear; other  
80 factors such as behavior, metamorphic rates, and baseline host fitness differ in low versus high  
81 density conditions and blur the effects of ranaviruses (Greer et al. 2008; Echaubard et al. 2010;  
82 Reeve et al. 2013).

83  
84 Over a four-year study period, we recorded estimated FV3 prevalence and developed  
85 explanatory models of prevalence in response to temperature, larval density, Gosner stage,  
86 spatial clustering of pools, and zooplankton communities. The objectives of this study were to  
87 better understand the influence of environmental and host conditions on FV3 outbreaks in natural  
88 settings, furthermore we specifically wanted to quantify the effect of zooplankton on FV3  
89 prevalence within natural systems. The use of newly constructed ponds in the study site  
90 presented a unique opportunity to assess FV3 risk in ponds that have a known history and were  
91 monitored since their creation.

92

## 93 **Methods**

### 94 *Study site*

95 Svend O. Heiberg Memorial Forest (42° 46' N, 76° 5' W), is a 1,600 ha property owned and  
96 maintained by the State University of New York College of Environmental Science and Forestry  
97 (SUNY ESF). An array of 71 vernal pool basins (Figure 1A) was constructed in 2010 by SUNY  
98 ESF and the Upper Susquehanna Coalition, to recreate *L. sylvaticus* and spotted salamander  
99 (*Ambystoma maculatum*) breeding habitat previously destroyed by land use change associated  
100 with the sequence of forest clearance, intensive agriculture, and subsequent agricultural  
101 abandonment and forest regrowth over the last two centuries. Pools varied from 3m-10m

102 diameter, with most circular or ovular in shape. Pools were designed to be hydrologically  
103 isolated and were arranged in clusters of 1, 3, or 9 pools within 164m-diameter landscape  
104 hexagons (Figure 1C). A separate cluster of 32 pools, the “microarray” (Figure 1B), was  
105 constructed in a grid pattern spanning forested, field, and edge habitats. Several naturally  
106 occurring vernal pools were also present within hexagon clusters.

107

### 108 *Sampling*

109 All constructed ponds containing water and four natural ponds were sampled at three separate  
110 intervals during *L. sylvaticus* larval development from 2011-2014. Sampling events were spaced  
111 three to four weeks apart and began approximately six to eight weeks after *L. sylvaticus* egg  
112 masses were observed, allowing tadpoles to develop to at least Gosner stage 25 (Gosner 1960).  
113 First sampling intervals occurred from mid-May to early June, depending on timing of spring  
114 thaw and *L. sylvaticus* breeding events. Sampling in 2013 was restricted to one interval in June-  
115 July.

116

117 Larval sampling at each interval was performed by modified pipe sampling methods as described  
118 in Werner et al. (2007). A 33 cm-diameter section of spiral duct pipe was plunged through the  
119 water column into the sediment, and tadpoles trapped within the pipe were collected by net  
120 sweeps and stored in buckets with water from the same pool. A sample was considered empty  
121 once zero individuals were captured for ten consecutive net sweeps. Samples were spaced at  
122 least 2 m apart with the exception of pools less than 5 m, from which approximately one sample  
123 per 2 m<sup>2</sup> of surface area was taken. Equipment was immersed in 10% bleach solution for at least  
124 60 seconds and allowed to air dry between pools. Thirty tadpoles were randomly selected for

125 processing in pools where at least 30 were captured, and all tadpoles were used in pools where  
126 less than 30 were captured. All other individuals were immediately returned to their pool of  
127 origin. Selected individuals were humanely euthanized by immersion in 70% ethanol, and stored  
128 in 95% ethanol at 4°C until further processing. Sampling was performed according to State  
129 University of New York College of Environmental Science and Forestry IACUC protocol  
130 #140201.

131

132 *Environmental and organism-focused parameters*

133 Marked wooden stakes were driven into the sediment in the estimated deepest area of each pool,  
134 and visited weekly to record water depth from the first spring thaw until November. Two  
135 temperature loggers (Thermochron® iButtons®, Embedded Data Systems, Lawrenceburg, KY)  
136 per pool were attached to 15 cm lengths of copper wire and coated with Performix® Plasti Dip®  
137 (Plasti Dip International, Blaine, MN). A length of epoxy coated rebar greater than the maximum  
138 depth for each pool was driven into the sediment near depth stakes, and one thermal logger was  
139 attached at the bottom of each pool. One thermal logger was affixed to the bottom of a foam float  
140 attached loosely to freely move up and down posts, to measure surface temperature. Thermal  
141 loggers were programmed to record readings every three hours, and were retrieved and redeployed  
142 every six months during the study period. Zooplankton concentrations were taken from Holmes  
143 et al. (2016). Briefly, zooplankton were sampled by passing 3 L of water, taken from the center  
144 of each pond, through an 80-µm sieve. Animals were preserved in 95% ethanol and manually  
145 counted and identified to the species level, or lowest taxonomic group possible when species  
146 could not be identified (Holmes et al. 2016).

147 *Ranaviral DNA screening methods*

148 PCR assays

149 Screening for the presence of ranaviral DNA followed the methods outlined in Youker-Smith et  
150 al. (2016), and a full description of the employed protocols is given in the supplementary  
151 materials. Briefly, DNA was isolated and purified from up to 25 mg tadpole liver tissue using a  
152 modified salt extraction method (Sambrook and Russell 2001). Template DNA (5 µL) was then  
153 amplified with conventional PCR using primers for *Frog virus 3* major capsid protein (MCP) 4  
154 and 5 as described in Mao et al. (1997; MCP 4: 5'-GAC TTG GCC ACT TAT GAC-3'; MCP 5:  
155 5'-GTC TCT GGA GAA GAA GAA-3'). Amplified base pair segments were separated by 1%  
156 agarose gel electrophoresis and stained with ethidium bromide for visualization. Sequenced  
157 DNA from a dead *L. sylvaticus* tadpole sampled in June 2011 from Hexagon 11 was used as  
158 positive control. Negative and ambiguous results were re-amplified using the above methods to  
159 increase screening sensitivity. For the 2014 samples negative or ambiguous results were re-  
160 analyzed via quantitative PCR using a protocol modified from Pallister et al. (2007).

161

162 *Sequencing*

163 Amplified PCR products from four dead or moribund *L. sylvaticus* collected from die-offs in  
164 Hexagons 11 and 5 (Figure 1C) in 2011 were purified using Omega E.Z.N.A.® Cycle Pure Kit  
165 (Omega Bio-tek Inc., Norcross, GA). Purified products were sequenced at the Yale University  
166 DNA Analysis Facility. Sequences were aligned with BioEdit v 7.2.5 and a GenBank (Clark et  
167 al. 2016) sequence search performed using nucleotide BLAST®, targeting nucleotide collection  
168 entries optimized for highly similar sequences (Johnson et al. 2008).

169 *Data Analysis*

170 *Frog virus 3* (FV3) prevalence was modeled using hierarchical generalized linear regression  
171 models (GLMs) with binomial error distribution and logit link function in response to the  
172 following variables: temperature, water depth, Gosner developmental stage, tadpole host density,  
173 water depth, the average distance to the three nearest neighboring pools (as a measure of spatial  
174 clustering of pools), and total pelagic zooplankton concentration (Table 1). No temperature or  
175 zooplankton data were available for the single sampling interval in 2013, and the corresponding  
176 prevalence data were therefore excluded from the statistical analysis.

177 GLM parameters were estimated in a hierarchical Bayesian framework using the rstan and  
178 rethinking packages in R. This inference framework provided a coherent approach to modelling  
179 missing predictor values, which was essential to maintain a dataset representative of the  
180 sampling design, given that zooplankton data were only available for approximately 50% of  
181 samples (Table 1). Apart from the interpond distances, all other predictor variables exhibited a  
182 lesser degree of missingness (Temperature 9%, Host density 16%, Water level 20%, Gosner  
183 stage 10%) as a result of logistical constraints on sampling and/or equipment failures.

184 A hierarchical model structure was chosen to accommodate so-called random intercepts for each  
185 of the nine sampling occasions. Model structure was as follows:

186

187 
$$N^{pos}_{ij} \sim \text{Binomial}(N^{total}_{ij}, p_{ij}),$$

188

189 where  $N^{pos}_{ij}$  are the number of FV3 positive tadpoles out of a sample of  $N^{total}_{ij}$  in pool  $i$  at  
190 sampling occasion  $j$ , and  $p_{ij}$  is the expected FV3 prevalence, modeled itself as

191



192  $\text{logit}(p_{ij}) = \beta_0 + \beta_1 X_{1i} + \beta_2 X_{2i} + \dots + \beta_n X_{ni} + W_j,$

193

194 where  $\beta_{1\dots n}$  are the regression coefficients for predictors  $X_{1\dots n}$  for pool  $i$ .  $W_j$  is the random  
195 intercept for sampling interval  $j$ , and was modelled as  $W_j \sim \text{Normal}(0, \sigma_w)$ . Further, missing  
196 predictor values  $X_{ni}$  were estimated as coming from a normal distribution  $X_{ni} \sim \text{Normal}(\mu_{X_n}, \sigma_{X_n})$ ,  
197 the mean and variance of which were estimated from the observed values of each predictor  
198 jointly with all other model parameters.

199

200 Following recommendations in Gelman et al. (2008) and McElreath (2016) we employed weakly  
201 informative priors to regularize extreme inferences that can be obtained using maximum  
202 likelihood or completely non-informative priors.  $\text{Normal}(0, 10)$  priors were chosen for all  
203 regression coefficients, Half-Cauchy(0, 2) priors for all variance parameters. The priors for the  
204 mean  $\mu_{X_n}$  of a missing predictor values followed a normal distribution centered on the mean of  
205 the observed predictor values with a standard deviation of 10.

206

207 Candidate models with different predictor combinations were evaluated using leave-one-out  
208 cross-validation (LOO) as implemented in the loo package in R (Vehtari et al. 2017), and ranked  
209 using the LOO information criterion  $\text{IC}_{\text{LOO}}$ .  $\text{IC}_{\text{LOO}}$  is asymptotically equal to the Watanabe-  
210 Akaike information criterion (WAIC; Watanabe 2010) as a means for estimating pointwise out-  
211 of-sample prediction accuracy, but is more robust for finite sample sizes (Vehtari et al. 2017).

## 212 **Results**

213 DNA sequences obtained from four *L. sylvaticus* individuals exhibiting ranavirus pathologies in  
214 2011 shared 100% identity with *Frog virus 3* isolate D1 major capsid protein gene (GenBank  
215 accession JQ771299). *Frog virus 3* site-wide prevalence ranged from 0.03 to 0.57.

216

217 The model with the highest predictive accuracy included temperature, Gosner stage, water level,  
218 host density, zooplankton density and a measure of spatial clustering as predictors. Within this  
219 model, FV3 prevalence decreased with water temperature ( $\beta = -0.25$ , 95% CI (-0.40,-0.11); Fig.  
220 2A). and increased with increasing water level ( $\beta = 0.05$ , 95% CI(0.03,0.17); Fig. 2C). Further,  
221 prevalence increased with an increase in host density ( $\beta = 0.32$ , 95% CI (0.08, 0.58); Fig. 2D),  
222 but decreased markedly with increasing zooplankton densities ( $\beta = -0.63$ , 95%CI (-0.75, -0.51);  
223 Fig. 2E). Prevalence decreased slightly with increasing distance to neighboring pools ( $\beta = -0.70$ ,  
224 95% CI (-1.04, -0.37); Fig. 2F), although a model without this predictor had a similar predictive  
225 accuracy ( $\Delta\text{IC} = 8$ , SE 18; Table S1). There was also some evidence that prevalence increased  
226 slightly as frogs approached metamorphosis (i.e. Gosner stage 42; ( $\beta = 0.08$ , 95% CI (-  
227 0.01,0.17); Fig. 2B). Models incorporating fewer covariates exhibited a substantially lower  
228 predictive accuracy (Table S1).

229

## 230 **Discussion**

231 The results of this study showed that low temperature, high host density, low zooplankton  
232 concentrations, deep water, the close vicinity of other pools, and host Gosner stages approaching  
233 metamorphosis were predictors of high FV3 prevalence. These results showed how responses of  
234 ranaviruses and hosts to environmental conditions tested in controlled laboratory, or even

235 mesocosm, experiments, may not be representative of what can be expected in a natural setting.

236 These findings also provided novel evidence that zooplankton may play a significant role in

237 reducing prevalence of ranaviruses in the natural environment – a phenomenon previously only

238 studied in laboratory settings (Johnson and Brunner 2014).

239

240 Individual parameters in this study did not conform to previously reported results for several

241 possible reasons. Water temperature was included in all best fit candidates for both models, and

242 produced negative trends with respect to FV3 prevalence. This was in contrast to controlled

243 studies supporting positive trends (Bayley et al. 2013; Brand et al. 2016). However, unlike in

244 laboratory settings, temperature levels fluctuated with daily and seasonal cycles and were not

245 controlled and/or stable in these wild populations. Temperature, as measured in this study,

246 therefore likely also captures other aspects of the forest environment, and interacts with other

247 variables in the natural environment. Temperature effects are therefore not straightforward to

248 compare between laboratory studies and observations of free-living populations. As previously

249 mentioned, and as demonstrated e.g. in the frog–chytrid fungus system (Raffel et al. 2013),

250 effects of temperature on ranaviruses depend on both host susceptibility/immunity and pathogen

251 replication/virulence. In this study, the detrimental effects of cold temperatures on host immunity

252 may have overshadowed the effects of cold temperatures on FV3 virulence. Future studies at

253 Heiberg should include surveillance of *L. clamitans* tadpoles in the fall, after *L. sylvaticus* have

254 metamorphosed and temperatures decrease.

255

256 Although the credible interval for the effect of developmental stage on virus prevalence did

257 contain zero, over 90% of the posterior mass was positive, indicating increased prevalence with

258 Gosner stage, which is generally consistent with other literature regarding certain ranids (Haislip  
259 et al. 2011; Warne et al. 2011). However, Gray et al. (2007), in a study of FV3 prevalence in  
260 Tennessee wetlands, found no significant trends between prevalence and Gosner stage for *L.*  
261 *clamitans*. Similarly, Haislip et al. (2011) found no difference in infection or mortality rates  
262 between larval and metamorph stages in *L. sylvaticus* or *L. clamitans*. Overwintering *L.*  
263 *clamitans* should also be compared to *L. clamitans* who hatch and complete metamorphosis in  
264 the same year. Metamorphosis may be quantified by both growth rates (i.e. length and mass) and  
265 differentiation rates (i.e., the rate at which larvae progress through each Gosner stage).  
266 *Lithobates clamitans* who overwinter continue slow growth but cease differentiation during the  
267 coldest winter months (Smith-Gill and Berven 1979), and we do not yet know what effects this  
268 may have on probability of FV3 infection or mortality.

269

270 Density was included as a predictor in best fit models. Prevalence increased with increasing  
271 density, as may be expected from increased contact rates. Density-dependent infection with  
272 ranaviruses have been suggested based on some field studies (Green et al. 2002, Brunner et al.  
273 2004, but in other studies was either not a significant factor (Harp and Petranka 2006) or deemed  
274 “not a factor” (Gray et al. 2007) due to field observations and knowledge of study species, which  
275 we include in our subsequent discussion. Generally, “host density” from a disease transmission  
276 perspective is incredibly difficult to assess in a natural setting (and specifically this study) for  
277 several reasons. Larval amphibians other than the target species were often present in pools and  
278 their density was not quantified. These species often occupied the same feeding niches and  
279 aquatic zones (e.g. *A. maculatum* mostly remained in warm littoral zones or under leaf litter – the  
280 same areas in which *L. clamitans* most often occurred; *personal observation*), thus potentially

281 contributing to stress and greater transmission rates from increased contact. When overall pool  
282 density was low, tadpoles would often aggregate, thus increasing rates of contact. This same  
283 phenomenon was observed by Greer et al. (2008), in a study of density and ATV transmission  
284 among tiger salamanders (*Ambystoma tigrinum*). It is also virtually impossible in a natural  
285 setting to differentiate between density of infected individuals and density of susceptible hosts.  
286 Infection and mortality rates largely depend on the viral dose at which susceptible hosts are  
287 exposed (Brunner et al. 2005; Echaubard et al. 2010), and susceptible host density alone does not  
288 have significant effects on either infection or mortality (Greer et al. 2008; Echaubard et al. 2010;  
289 Reeve et al. 2013).

290

291 The best fit model also predicted an increase in prevalence with increasing water depth. This  
292 may in part be a reflection of the negative temperature-prevalence relationship we found, as  
293 deeper pools tend to have lower water temperatures. Furthermore, deeper pools would tend to not  
294 completely freeze down to the sediment during the winter, which may support overwintering of  
295 infected green frogs.

296

297 Non-amphibian community assemblages are often overlooked in studies of ranaviruses, and  
298 microbial and microinvertebrate communities may have substantial effects on pathogen  
299 virulence. Ranaviruses survive longer in sterilized environments (Nazir et al. 2012; Johnson and  
300 Brunner 2014; Munro et al. 2016), suggesting microbial competition may be a factor in reducing  
301 replication rates and infectivity. Zooplankton, specifically *Daphnia* spp., have been studied as  
302 potential biological control agents for another deadly amphibian disease, chytrid, caused by the  
303 fungus *Batrachochytrium dendrobatidis*. *Daphnia* spp. ingest zoospores and significantly

304 decrease concentrations of *B. dendrobatidis* in the environment (Buck et al. 2011). Johnson and  
305 Brunner (2014) observed a similar phenomenon with *Daphnia* and FV3; although *Daphnia* did  
306 not decrease the *abundance* of FV3, *infectivity* was reduced. The authors speculated virus  
307 particles were somehow mechanically inactivated by the digestive processes of *Daphnia*. In this  
308 study, *Daphnia* observations were too sparse to use as a predictor, but total zooplankton (which  
309 included *Daphnia* spp.) was a predictor that substantially improved predictive accuracy of  
310 models (Table S1). Pools with high zooplankton concentrations had substantially lower FV3  
311 prevalence than pools with less than c. 50 individuals per liter (Fig. 2E). This finding suggests  
312 microinvertebrate communities may have been overlooked thus far in the field of amphibian  
313 ranavirus research. Although *Daphnia* have been previously studied in controlled laboratory  
314 experiments, other zooplankton should be included in future research; in this study, “total  
315 zooplankton” also included copepods, ostracods, and non-*Daphnia* cladoceran species (Holmes  
316 et al. 2016).

317  
318 Clustering of pools had a small effect on FV3 prevalence, although including this parameter only  
319 provided a marginal improvement of predictive accuracy, when all other predictors were also  
320 considered. Spatial characteristics should be important drivers of transmission as sub-lethally  
321 infected adults travelling between sites could be sources of infection; however, we did not find  
322 this to be a strong predictor of FV3 prevalence in this system (also see Gahl and Calhoun 2008;  
323 Greer et al. 2009). Other potentially predictive parameters in future studies may be pool  
324 geographic locations, as pools at lower elevations and therefore lower catchment areas could  
325 receive more inputs from runoff (Gahl and Calhoun 2008).

326

327 Surveillance methods were not adequate to make inferences about FV3 transmission dynamics  
328 in this system, given the relatively sparse sampling in time, and because logistical constraints  
329 prohibited us from sampling all potential sites harbouring outbreaks. Surveillance for FV3  
330 detection in this study included the two most commonly observed anuran species, but in future  
331 studies involving transmission, other amphibian taxa must be considered. Several other larvae of  
332 aquatic-breeding amphibians were observed in the study pools, including (in order of decreasing  
333 abundance) spring peepers (*Pseudacris crucifer*), spotted salamanders (*Ambystoma maculatum*),  
334 American toads (*Anaxyrus americanus*), Eastern red-spotted newts (*Notophthalmus viridescens*),  
335 and American bullfrogs (*Lithobates catesbeianus*). Each of these species is susceptible, to some  
336 degree, to ranaviruses (Green et al. 2002; Gahl and Calhoun 2010; Hoverman et al. 2011;  
337 Hoverman et al. 2012; Richter et al. 2013) and could be additional sources of infection for *L.*  
338 *sylvaticus* and *L. clamitans*. Sub-clinically infected adults of these species also serve as potential  
339 reservoirs and may introduce ranaviruses to other populations, or re-introduce the virus in  
340 subsequent years (Brunner et al. 2004; North et al. 2015).

341  
342 Pool geomorphology is also an important consideration especially with constructed ponds.  
343 Higher prevalence of ranaviruses has been associated with constructed vs natural wetlands,  
344 which has been attributed to deeper basin shapes with little to no littoral zones, longer  
345 hydroperiods and less emergent vegetation (Petranka et al. 2003; Greer and Collins 2008; Richter  
346 et al. 2013), and utilization of ponds for cattle (Gray et al. 2007). Although study ponds at  
347 Heiberg were constructed, they were not representative of the “constructed ponds” referenced in  
348 the literature as having higher prevalence for several reasons. The Heiberg pools were located  
349 within a mainly densely forested landscape with no agricultural use or livestock access. Most

350 pool basins were gradually sloping, creating the broader littoral zones characteristic of natural  
351 pools. Although we did not quantify aquatic vegetation, we observed abundant vegetation  
352 (submergent, emergent, and free-floating) in many constructed ponds during sampling.  
353 Vegetation is a recommended parameter to include in future studies, as tadpoles may be more  
354 spatially distributed in ponds with greater vegetation thus decreasing rates of contact (Greer and  
355 Collins 2008). In these regards, constructed ponds at Heiberg appeared to mimic natural systems,  
356 with the exception of hydroperiod. Most ponds remained permanently filled, and the few that did  
357 not either contained no amphibian larvae or dried before larvae could reach metamorphosis.  
358 Ranaviruses cause mortality and may lead to reduced fitness, but aquatic breeding amphibians in  
359 particular are already subject to an onslaught of challenges prior to metamorphosis, with field  
360 mortality rates for larval anurans exceeding an average of 90% (Melvin and Houlahan 2012).  
361 This makes it difficult to determine the degree to which ranavirus-caused mortality exceeds the  
362 background rate. Continued disease surveillance therefore needs to be coupled with longitudinal  
363 population monitoring to detect long-term population effects of ranavirus prevalence, however  
364 our study has provided additional insights into ways of immediately reducing ranavirus infection  
365 and mortality in newly constructed ponds closely mimicking natural systems. Many factors must  
366 be taken into consideration when designing constructed wetlands such as – to name just a few –  
367 proximity to anthropogenic influence, hydrological catchment, availability of amphibian source  
368 populations, predation risk e.g. accessibility of the wetland to fish. In addition, by designing  
369 ponds with locations and basin geomorphologies favoring warmer temperatures, and stocking to  
370 establish a plankton community, we may further reduce disease risk and promote thriving  
371 populations in artificial wetlands.  
372



373 **Acknowledgments:**

374 We thank the Maurice Alexander memorial research fund, Western New York Herpetological  
375 Society, and SUNY ESF Graduate Student Association for funding. We also thank the Upper  
376 Susquehanna Coalition and SUNY ESF for access to forest properties, JB for molecular  
377 protocols, RO at Cornell University Animal Health Diagnostic Center, and JA, LO, LL, CR, GG  
378 and RS for field and laboratory assistance. Collection methods for live amphibians followed  
379 approved SUNY ESF IACUC protocol #140201.

380

381

382 **References**

- 383 Ariel E, Nicolajsen N, Christophersen M-B, Holopainen R, Tapiovaara H, Bang Jensen B. 2009.  
384 Propagation and isolation of ranaviruses in cell culture. *Aquaculture* 294:159–164.
- 385 Bates D, Maechler M, Bolker B, Walker S. 2015. Fitting Linear Mixed-Effects Models using  
386 lme4. *J. Stat. Softw.* 67:1–48.
- 387 Bayley A, Hill B, Feist S. 2013. Susceptibility of the European common frog *Rana temporaria* to  
388 a panel of ranavirus isolates from fish and amphibian hosts. *Dis. Aquat. Organ.* 103:171–  
389 183.
- 390 Berven KA. 1990. Factors Affecting Population Fluctuations in Larval and Adult Stages of the  
391 Wood Frog (*Rana Sylvatica*). *Ecology* 71:1599.
- 392 Brand MD, Hill RD, Brenes R, Chaney JC, Wilkes RP, Grayfer L, Miller DL, Gray MJ. 2016.  
393 Water Temperature Affects Susceptibility to Ranavirus. *EcoHealth* 13:350–359.
- 394 Brunner JL, Richards K, Collins JP. 2005. Dose and host characteristics influence virulence of  
395 ranavirus infections. *Oecologia* 144:399–406.
- 396 Brunner JL, Schock DM, Davidson EW, Collins JP. 2004. Intraspecific reservoirs: complex life  
397 history and the persistence of a lethal ranavirus. *Ecology* 85:560–566.
- 398 Buck JC, Truong L, Blaustein AR. 2011. Predation by zooplankton on *Batrachochytrium*  
399 *dendrobatidis*: biological control of the deadly amphibian chytrid fungus? *Biodivers.*  
400 *Conserv.* 20:3549–3553.
- 401 Clark K, Karsch-Mizrachi I, Lipman DJ, Ostell J, Sayers EW 2016. GenBank. *Nucleic Acids*  
402 *Res.* 44(D1):D67-72.
- 403 Daszak P, Berger L, Cunningham AA, Hyatt AD, Green DE, Speare R. 1999. Emerging  
404 infectious diseases and amphibian population declines. *Emerg. Infect. Dis.* 5:735–748.

- 405 Duffus ALJ, Waltzek TB, Stohr AC, Allender MC, Gotesman M, Whittington RJ, Hick P, Hines  
406 MK, Marschang RE. 2015. Distribution and Host Range of Ranaviruses. In: Ranaviruses:  
407 Lethal Pathogens of Ectothermic Vertebrates. Springer International Publishing. p. 9–57.
- 408 Echaubard P, Leduc J, Pauli B, Chinchar VG, Robert J, Lesbarrères D. 2014. Environmental  
409 dependency of amphibian–ranavirus genotypic interactions: evolutionary perspectives on  
410 infectious diseases. *Evol. Appl.* 7:723–733.
- 411 Echaubard P, Little K, Pauli B, Lesbarrères D. 2010. Context-dependent effects of ranaviral  
412 infection on Northern leopard frog life history traits. *PloS ONE* 5:e13723.
- 413 Forson DD, Storfer A. 2006. Atrazine increases ranavirus susceptibility in the tiger salamander,  
414 *Ambystoma tigrinum*. *Ecol. Appl.* 16:2325–2332.
- 415 Gahl M, Calhoun A. 2008. Landscape setting and risk of Ranavirus mortality events. *Biol.*  
416 *Conserv.* 141:2679–2689.
- 417 Gahl MK, Calhoun AJK. 2010. The role of multiple stressors in ranavirus-caused amphibian  
418 mortalities in Acadia National Park wetlands. *Can. J. Zool.* 88:108–121.
- 419 Gelman A, Jakulin A, Pittau MG, Su Y-S. 2008. A weakly informative default prior distribution  
420 for logistic and other regression models. *Annals of Applied Statistics* 2:1360-1383.
- 421 Gibbs JP, Breisch AR, Ducey PK, Johnson G, Behler J, Bothner R. 2007. *The Amphibians and*  
422 *Reptiles of New York State: Identification, Natural History, and Conservation.* Oxford  
423 University Press.
- 424 Gosner KL. 1960. A simplified table for staging anuran embryos and larvae with notes on  
425 identification. *Herpetologica* 16:183–190.
- 426 Gray MJ, Miller DL, Schmutzer AC, Baldwin CA. 2007. Frog virus 3 prevalence in tadpole  
427 populations inhabiting cattle-access and non-access wetlands in Tennessee, USA. *Dis.*

- 428           Aquat. Organ. 77:97–103.
- 429   Green D, Converse KA, Schrader AK. 2002. Epizootiology of Sixty-Four Amphibian Morbidity  
430           and Mortality Events in the USA, 1996-2001. *Ann. N. Y. Acad. Sci.* 969:323–339.
- 431   Greer AL, Briggs CJ, Collins JP. 2008. Testing a key assumption of host-pathogen theory:  
432           density and disease transmission. *Oikos* 117:1667–1673.
- 433   Greer AL, Brunner JL, Collins JP. 2009. Spatial and temporal patterns of *Ambystoma tigrinum*  
434           virus (ATV) prevalence in tiger salamanders *Ambystoma tigrinum nebulosum*. *Dis.*  
435           *Aquat. Organ.* 85:1–6.
- 436   Greer AL, Collins JP. 2008. Habitat fragmentation as a result of biotic and abiotic factors  
437           controls pathogen transmission throughout a host population. *J. Anim. Ecol.* 77:364–369.
- 438   Haislip NA, Gray MJ, Hoverman JT, Miller DL. 2011. Development and Disease: How  
439           Susceptibility to an Emerging Pathogen Changes through Anuran Development. *PLoS*  
440           *ONE* 6:e22307.
- 441   Harp EM, Petranka JW (2006) Ranavirus in wood frogs (*Rana sylvatica*): potential sources of  
442           transmission within and between ponds. *J Wildl Dis* 42:307–318
- 443   Holmes CJ, Figary S, Schulz KL, Cáceres CE. 2016. Effects of diversity on community  
444           assembly in newly formed pond communities. *Ecosphere* 7:e01377
- 445   Hoverman JT, Gray MJ, Haislip NA, Miller DL. 2011. Phylogeny, life history, and ecology  
446           contribute to differences in amphibian susceptibility to ranaviruses. *EcoHealth* 8:301–  
447           319.
- 448   Hoverman JT, Gray MJ, Miller DL, Haislip NA. 2012. Widespread Occurrence of Ranavirus in  
449           Pond-Breeding Amphibian Populations. *EcoHealth* 9:36–48.
- 450   Jancovich JK, Davidson EW, Parameswaran N, Mao J, Chinchar VG, Collins JP, Jacobs BL,

- 451 Storfer A. 2005. Evidence for emergence of an amphibian iridoviral disease because of  
452 human-enhanced spread. *Mol. Ecol.* 14:213–224.
- 453 Johnson A, Brunner J. 2014. Persistence of an amphibian ranavirus in aquatic communities. *Dis.*  
454 *Aquat. Organ.* 111:129–138.
- 455 Johnson M, Zaretskaya I, Raytselis Y, Merezhuk Y, McGinnis S, Madden T.L. 2008. NCBI  
456 BLAST: a better web interface. *Nucleic Acids Res.* 36:W5-W9.
- 457 Mao J, Hedrick R, Chinchar V. 1997. Molecular Characterization, Sequence Analysis, and  
458 Taxonomic Position of Newly Isolated Fish Iridoviruses. *Virology* 229:212–220.
- 459 McElreath R. 2016. *Statistical Rethinking – A Bayesian Course with Examples in R and Stan.*  
460 CRC Press.
- 461 Melvin SD, Houlahan JE. 2012. Tadpole mortality varies across experimental venues: do  
462 laboratory populations predict responses in nature? *Oecologia* 169:861–868.
- 463 Miller DL, Gray MJ, Rajeev S, Schmutzer AC, Burton EC, Merrill A, Baldwin CA. 2009.  
464 Pathologic findings in larval and juvenile anurans inhabiting farm ponds in Tennessee,  
465 USA. *J. Wildl. Dis.* 45:314–324.
- 466 Munro J, Bayley AE, McPherson NJ, Feist SW. 2016. Survival of Frog virus 3 in Freshwater and  
467 Sediment from an English Lake. *J. Wildl. Dis.* 52:138–142.
- 468 Nazir J, Spengler M, Marschang RE. 2012. Environmental persistence of amphibian and reptilian  
469 ranaviruses. *Dis. Aquat. Organ.* 98:177–184.
- 470 North AC, Hodgson DJ, Price SJ, Griffiths AGF. 2015. Anthropogenic and Ecological Drivers of  
471 Amphibian Disease (Ranavirosis). Kerby JL, editor. *PLoS ONE* 10:e0127037.
- 472 Pallister J, Gould A, Harrison D, Hyatt A, Jancovich J, Heine H. 2007. Development of real-time  
473 PCR assays for the detection and differentiation of Australian and European ranaviruses.

- 474 J. Fish Dis. 30:427–438.
- 475 Paull SH, Johnson, PTJ 2018. How temperature, pond-drying, and nutrients influence parasite  
476 infection and pathology. EcoHealth DOI: 10.1007/s10393-018-1320-yPetranka JW,  
477 Murray SS, Kennedy CA. 2003. Responses of amphibians to restoration of a southern  
478 Appalachian wetland: perturbations confound post-restoration assessment. Wetlands  
479 23:278–290.
- 480 Petranka JW, Harp EM, Holbrook CT, Hamel JA. 2007. Long-term persistence of amphibian  
481 populations in a restored wetland complex. Biol. Conserv. 138:371–380.
- 482 Raffel, T. R., J. M. Romansic, N. T. Halstead, T. A. McMahon, M. D. Venesky, and J. R. Rohr.  
483 2013. Disease and thermal acclimation in a more variable and unpredictable climate.  
484 Nature Climate Change 3:146-151.
- 485 Reeve BC, Crespi EJ, Whipps CM, Brunner JL. 2013. Natural Stressors and Ranavirus  
486 Susceptibility in Larval Wood Frogs (*Rana sylvatica*). EcoHealth 10:1–11.
- 487 Richter SC, Drayer AN, Strong JR, Kross CS, Miller DL, Gray MJ. 2013. High Prevalence of  
488 Ranavirus Infection in Permanent Constructed Wetlands in Eastern Kentucky, USA.  
489 Herpetol. Rev. 44:464–466.
- 490 Rojas S, Richards K, Jancovich JK, Davidson EW. 2005. Influence of temperature on Ranavirus  
491 infection in larval salamanders *Ambystoma tigrinum*. Dis. Aquat. Organ. 63:95–100.
- 492 Sambrook J, Russell DW. 2001. Molecular cloning: a laboratory manual. Cold Spring Harb. Lab.  
493 Press Cold Spring Harb. N. Y. 2.
- 494 Smith-Gill SJ, Berven KA. 1979. Predicting amphibian metamorphosis. Am. Nat. 113:563–585.
- 495 Storfer A, Alfaro ME, Ridenhour BJ, Jancovich JK, Mech SG, Parris MJ, Collins JP. 2007.  
496 Phylogenetic concordance analysis shows an emerging pathogen is novel and endemic.

- 497 Ecol. Lett. 10:1075–1083.
- 498 Vehtari A, Gelman A, Gabry J. 2017 Practical Bayesian model evaluation using leave-one-out  
499 cross-validation and WAIC. *Stat. Comput.* 27:1413-1432
- 500 Warne RW, Crespi EJ, Brunner JL. 2011. Escape from the pond: stress and developmental  
501 responses to ranavirus infection in wood frog tadpoles. *Funct. Ecol.* 25:139–146.
- 502 Watanabe S. 2010 Asymptotic equivalence of Bayes cross validation and widely applicable  
503 information criterion in singular learning theory. *J. Machine. Learn. Res.* 11:3571-3594
- 504 Werner EE, Skelly DK, Relyea RA, Yurewicz KL. 2007. Amphibian species richness across  
505 environmental gradients. *Oikos* 116:1697–1712.
- 506 Youker-Smith TE, Whipps CM, Ryan SJ. 2016. Detection of an FV3-like Ranavirus in Wood  
507 Frogs (*Lithobates sylvaticus*) and Green Frogs (*Lithobates clamitans*) in a Constructed  
508 Vernal Pool Network in Central New York State. *Herpetological Reviews.* 47:595-598  
509

510 **Tables**

511

512 **Table 1:** List of explanatory variables for generalized linear models of Frog virus 3 (FV3)  
513 prevalence in vernal ponds. Missingness gives the proportion of FV3 prevalence observations for  
514 which no corresponding observation of a particular environmental covariate was available.  
515

|        | Variable                          | Unit                                                              | Transformation | Missingness |
|--------|-----------------------------------|-------------------------------------------------------------------|----------------|-------------|
| TEMP   | Temperature                       | °C                                                                | N/A            | 15/170      |
| DENS   | Areal density                     | individuals/m <sup>2</sup>                                        | Logarithmic    | 27/170      |
| WLEV   | Water depth                       | cm                                                                | N/A            | 35/170      |
| GOSNER | Gosner developmental stage        | Stage 1-46 (Gosner 1960)                                          | N/A            | 18/170      |
|        | Spatial clustering of pools       | Average straight line distance (in meters) to the nearest 3 pools |                | 0/170       |
| DIST   | Pelagic zooplankton concentration |                                                                   | Logarithmic    | 82/170      |
| PLANK  |                                   | individuals/L                                                     | Logarithmic    |             |

516

517



518 **Table 2:** Posterior estimates of regression coefficients for the best predictive model

|            | Mean  | StdDev | 95% credible interval |       |
|------------|-------|--------|-----------------------|-------|
| Intercept  | 3.22  | 2.37   | -1.30                 | 7.60  |
| GOSNER     | 0.08  | 0.05   | -0.01                 | 0.17  |
| TEMP       | -0.25 | 0.07   | -0.40                 | -0.11 |
| log(DENS)  | 0.32  | 0.13   | 0.08                  | 0.58  |
| WLEV       | 0.05  | 0.01   | 0.03                  | 0.07  |
| log(PLANK) | -0.63 | 0.06   | -0.75                 | -0.51 |
| log(DIST)  | -0.70 | 0.17   | -1.04                 | -0.37 |
| sigma_W    | 1.54  | 0.49   | 0.84                  | 2.63  |

519

520 **Figures**

521 **Figure 1:** (A) Vernal pool array within Heiberg Memorial Forest (shaded area). Pools were  
522 constructed (B) in a separate grid- patterned microarray, as well as (C) in clusters of 1, 3, or 9  
523 pools within uniform landscape hexagonal areas. Study pools included constructed pools (open  
524 circles) with three pre-existing pools (filled circles). Sixteen pools failed to hold water at any  
525 point in the study, here designated as “dry” (crosses).  
526

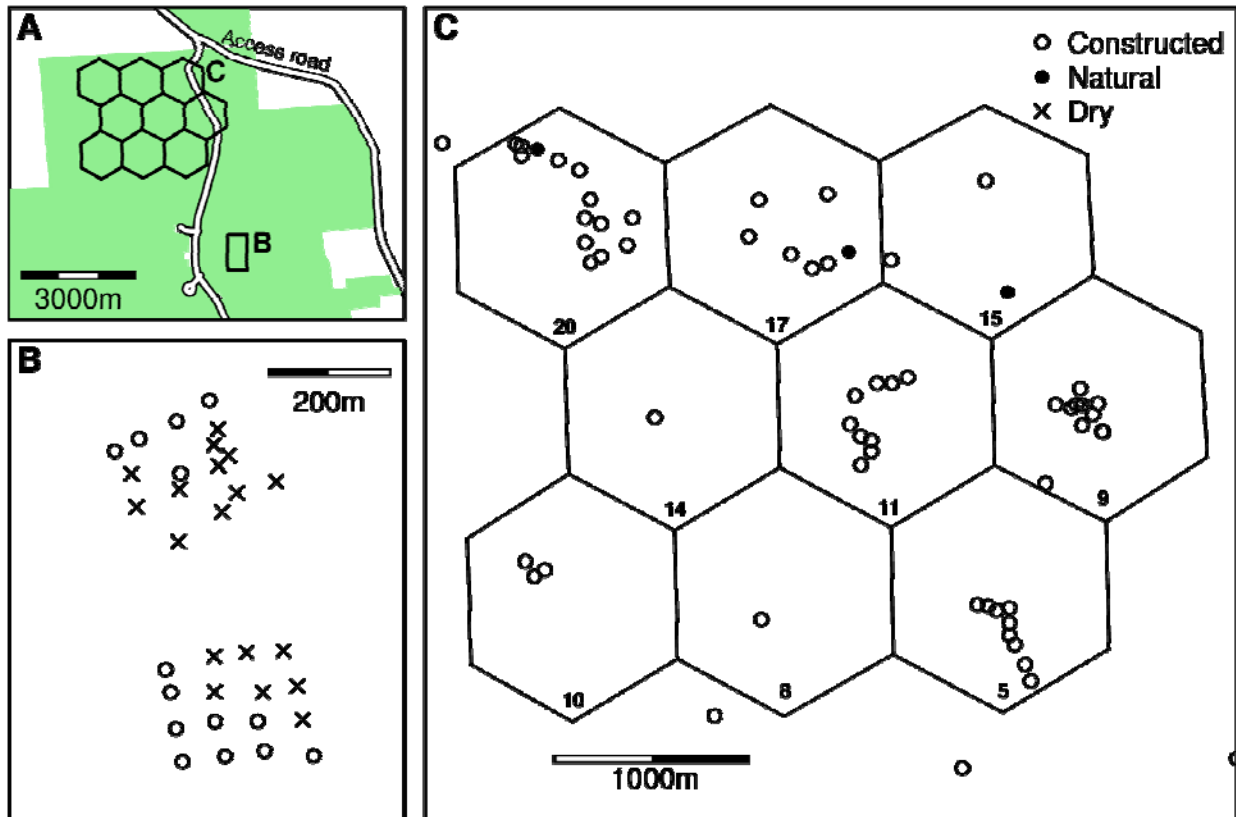

527  
528

529 **Figure 2:** Observed Frog virus 3 prevalence in relation to environmental covariates water  
530 temperature (A), developmental stage (B), pond water level (C), host density (D), zooplankton  
531 density (E), and average distance to the three nearest neighboring ponds (F) on Frog virus 3  
532 prevalence. Prevalence values are jittered along the y-axis by up to 0.03 units to alleviate  
533 overplotting. Symbol size reflects the number of successfully assayed tadpoles in a given sample.  
534

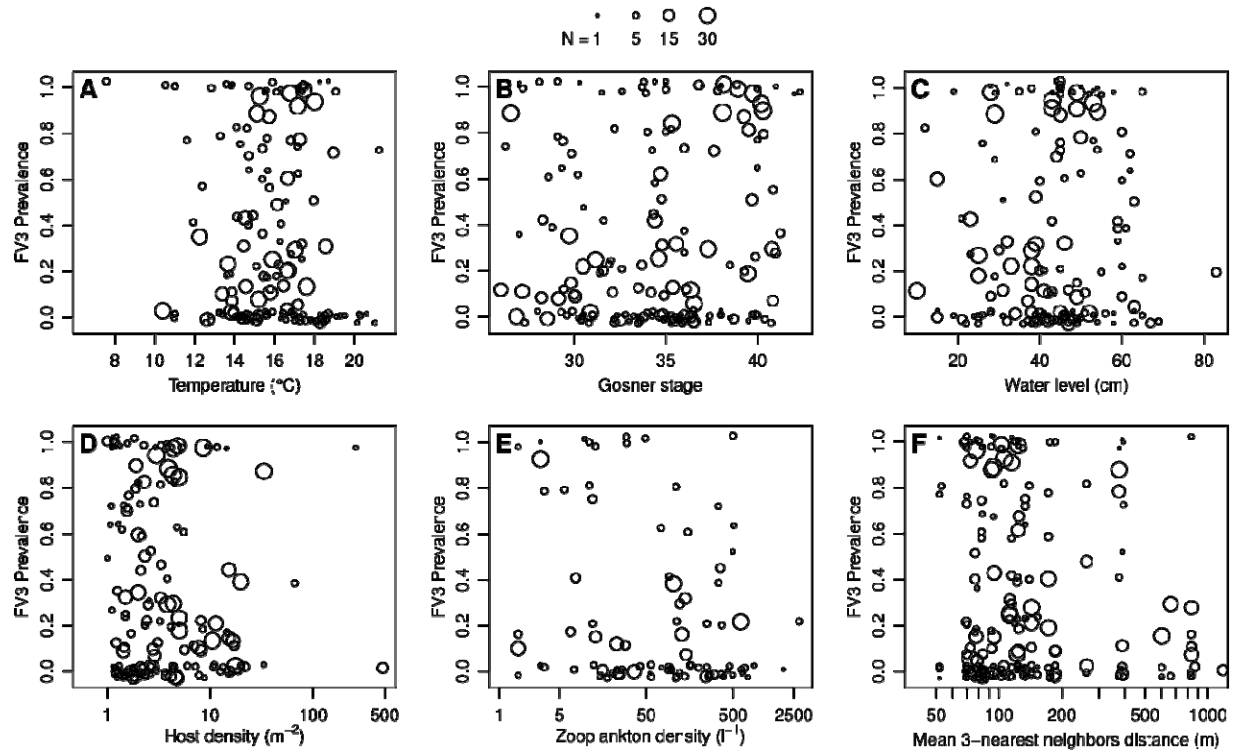

535

536

537 **Figure 3:** Partial effects of environmental covariates water temperature (A), developmental stage  
538 (B), pond water level (C), host density (D), zooplankton density (E), and average distance to the  
539 three nearest neighboring ponds (F) on Frog virus 3 prevalence, as estimated in the best  
540 predictive model. Black lines represent posterior means of regression coefficients, grey lines are  
541 1000 draws from the posterior of each regression coefficient. Predictor observations are  
542 indicated by the black tickmarks along the x-axes.  
543

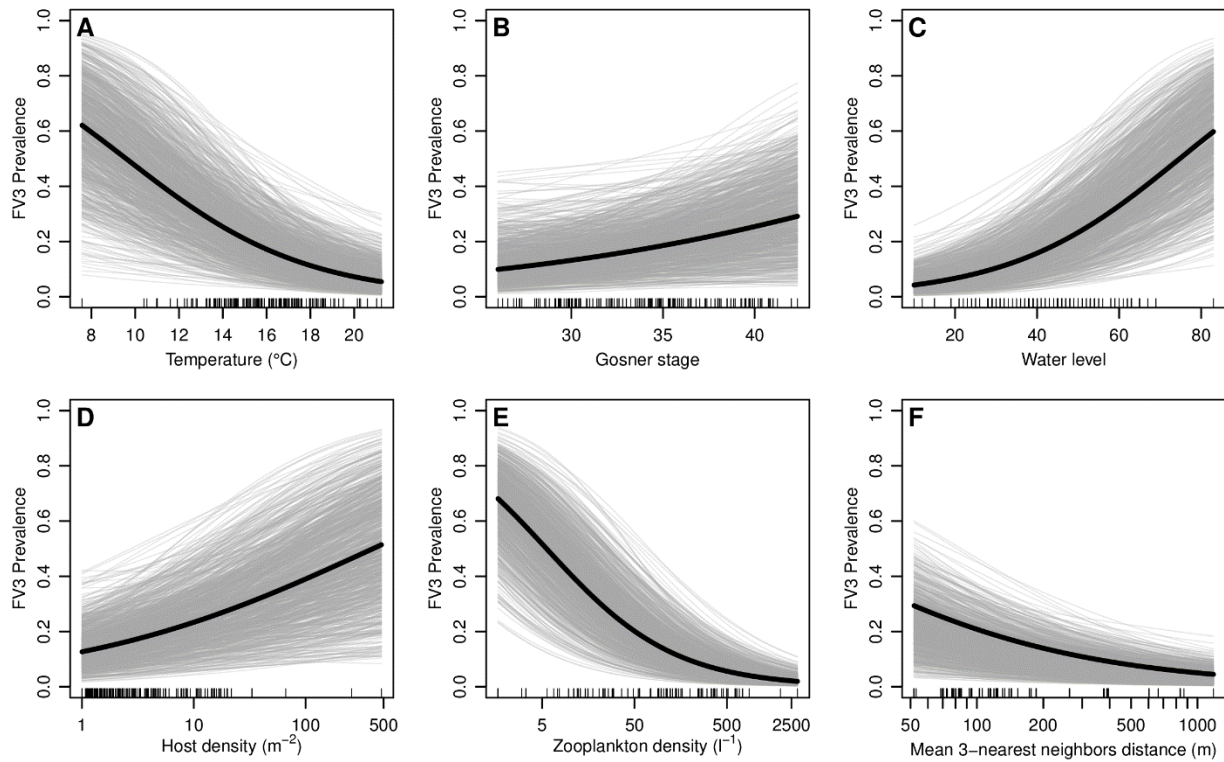

544  
545

546 **Supplementary Materials for**  
547 **Environmental drivers of ranavirus in free-living amphibians in constructed ponds**  
548  
549 **Supplementary Methods - Quantitative PCR protocol**  
550 Negative or ambiguous results were analyzed via quantitative PCR at Cornell University Animal  
551 Health Diagnostic Center using the following protocol modified from Pallister et al. (2007): Five  
552  $\mu\text{L}$  template DNA was added to 5  $\mu\text{L}$  Invitrogen TaqMan® Fast Virus 1-Step Master Mix, 0.05  
553  $\mu\text{L}$  fluorescent probe (100  $\mu\text{M}$ ; 5'-CAC AAC ATT ATC CGC ATC-3'), and 0.18  $\mu\text{L}$  primers  
554 (100  $\mu\text{M}$ ; rtMCP-F: 5'-CTC ATC GTT CTG GCC ATC AA-3'; rtMCP-R: 5'-TCC CAT CGA  
555 GCC GTT CA-3') to a total volume of 20  $\mu\text{L}$ . Samples were run alongside negative and positive  
556 controls in 48-well plates using Applied Biosystems StepOne™ real-time PCR system and  
557 analyzed with StepOne software v2.3. A synthetic Ultramer® oligomer containing binding sites  
558 from primers and probe described above was used as positive control (R. Ossiboff, Cornell  
559 University Animal Health Diagnostic Center; 5'- AAG ACT TGG CCA CTT ATG ACT TGC  
560 ATC GGC AGC AAA TCT CAT CGT TCT GGC CAT CAA CCA CAA CAT TAT CCG CAT  
561 CAT CAA CGG CTC GAT GGG ATG CCA TAT TTT AAG AGA ATT ATC GAG GTC TCT  
562 GGA GAA CAA GAA CG - 3'). Five serial dilutions of 1:10 were run in duplicate and used to  
563 calibrate a set of standards, and a cycle threshold ( $C_T$ ) was set at the logarithmic center of  
564 standard linear growth curves for each run. Samples with  $C_T < 36$  were declared positive; this  
565 threshold was based on mean  $C_T$  values of the lowest concentration of positive control ( $1 \times 10^3$   
566 nM).  
567

568 **Supplementary Table – Model selection**

569 **Table S1: Model selection results for generalized linear models of Frog virus 3 prevalence.**

570  $IC_{LOO}$ : Leave-one-out cross validation Information Criterion;  $p_{LOO}$ : estimated effective number  
 571 of parameters;  $\Delta_{IC}$   $IC_{LOO}$  difference to best model; SE() standard error. See Table 1 for predictor  
 572 variable descriptions. The cross validation procedure yields an estimate of the information  
 573 criterion, and the associated uncertainty. Model comparison is therefore based not just on  $\Delta_{IC}$   
 574 values (and arbitrary difference thresholds), as is routinely done with AIC differences in  
 575 maximum likelihood frameworks, but by taking the standard error for the estimated  $\Delta_{IC}$  into  
 576 account.

577

| Model                                                        | $IC_{LOO}$ | SE( $IC_{LOO}$ ) | $\Delta_{IC}$ (SE) | $p_{LOO}$ | SE( $p_{LOO}$ ) |
|--------------------------------------------------------------|------------|------------------|--------------------|-----------|-----------------|
| TEMP + GOSNER + log(DENS) +<br>WLEV + log(PLANK) + log(DIST) | 704        | 65               |                    | 117.4     | 15.4            |
| TEMP + GOSNER + log(DENS) +<br>WLEV + log(PLANK)             | 712        | 67               | 8 (18)             | 113.2     | 14.7            |
| TEMP + GOSNER + log(DENS) +<br>WLEV + log(DIST)              | 989        | 116              | 286 (85)           | 115.5     | 22.1            |
| TEMP + GOSNER + log(DENS) +<br>WLEV                          | 1003       | 112              | 300 (84)           | 116.8     | 22.5            |

578

579

580 **References**

- 581 Pallister J, Gould A, Harrison D, Hyatt A, Jancovich J, Heine H. 2007. Development of real-time  
582 PCR assays for the detection and differentiation of Australian and European ranaviruses. *J. Fish*  
583 *Dis.* 30:427–438.
